# Supplementary material
Source: Research Square preprint supplement (doi:10.21203/rs.3.rs-9679046/v1)
Supplement: Supplementary file 1 [file 21e966801d9f4b6a22179bc8.docx]

**Table 1 -** Physicochemical and surface characterization results

| **% Chamotte** | **Contact angle (°)** | **Density (g/cm³)** | **Water absorption (%)** |
| --- | --- | --- | --- |
| 0,0% | 68,5 | 1,207 | 1,56 |
| 0,5% | 57,8 | 1,216 | 1,48 |
| 1,0% | 51,2 | 1,220 | 1,47 |
| 1,5% | 54,6 | 1,242 | 1,51 |
| 2,0% | 60,3 | 1,257 | 1,54 |

**Table 2-** Analysis of variance (ANOVA) of the properties of Chamotte-reinforced composites a) Stress – Flexural; b) Strain – Flexural; c) Stress – Tensile; d) Strain – Tensile; e) Stress – Compression; f) Strain – Compression; g) Impact Izod test; h) Shore hardness A

| 1. **Stress – Flexure** | | | | | | |
| --- | --- | --- | --- | --- | --- | --- |
| **Source** | **Sum of Squares** | **Degrees of Freedom** | **Mean Squares** | **F (Calculated)** | **p-Value** | **F Critical** |
| **Between Groups** | 12 863 | 4 | 3 215,8 | **≈ 296,4** | **< 0,001** | 2,87 |
| **Within Groups** | 217 | 20 | 10,85 | — | — | — |
| **Total** | 13 080 | 24 | — | — | — | — |
| 1. **Strain – Flexure** | | | | | | |
| **Source** | **Sum of Squares** | **Degrees of Freedom** | **Mean Squares** | **F (Calculated)** | **p-Value** | **F Critical** |
| **Between Groups** | 3,61 | 4 | 0,902 | **≈ 11,1** | **< 0,001** | 2,87 |
| **Within Groups** | 1,63 | 20 | 0,081 | — | — | — |
| **Total** | 5,24 | 24 | — | — | — | — |
| 1. **Stress – Tension** | | | | | | |
| **Source** | **Sum of Squares** | **Degrees of Freedom** | **Mean Squares** | **F (Calculated)** | **p-Value** | **F Critical** |
| **Between Groups** | 117,62 | 4 | 29,41 | 5,08 | **< 0,001** | 2,87 |
| **Within Groups** | 173,81 | 30 | 5,79 | — | — | — |
| **Total** | **291,43** | **34** | — | — | — | — |
| 1. **Strain – Tension** | | | | | | |
| **Source** | **Sum of Squares** | **Degrees of Freedom** | **Mean Squares** | **F (Calculated)** | **p-Value** | **F Critical** |
| **Between Groups** | **6,38** | 4 | **1,59** | **6,72** | **< 0,001** | **2,87** |
| **Within Groups** | **4,73** | 20 | **0,24** | — | — | — |
| **Total** | **11,11** | 24 | — | — | — | — |
| 1. **Stress – Compression** | | | | | | |
| **Source** | **Sum of Squares** | **Degrees of Freedom** | **Mean Squares** | **F (Calculated)** | **p-Value** | **F Critical** |
| **Between Groups** | 3244,5 | 4 | 811,1 | 29,4 | < 0,001 | **2,87** |
| **Within Groups** | 829,0 | 30 | 27,6 | — | — | — |
| **Total** | 4073,5 | 34 | — | — | — | — |
| 1. **Strain – Compression** | | | | | | |
| **Source** | **Sum of Squares** | **Degrees of Freedom** | **Mean Squares** | **F (Calculated)** | **p-Value** | **F Critical** |
| **Between Groups** | **30,19** | 4 | **7,55** | **2,78** | **0,056** | **2,87** |
| **Within Groups** | **54,31** | 20 | **2,72** | — | — | — |
| **Total** | **84,50** | 24 | — | — | — | — |
| 1. **Izod test** | | | | | | |
| **Source** | **Sum of Squares** | **Degrees of Freedom** | **Mean Squares** | **F (Calculated)** | **p-Value** | **F Critical** |
| **Between Groups** | **0,48** | 4 | **0,12** | **0,37** | **0,83** | **2,87** |
| **Within Groups** | **6,50** | 20 | **0,33** | — | — | — |
| **Total** | **6,98** | 24 | — | — | — | — |
| 1. **Shore D Hardness** | | | | | | |
| **Source** | **Sum of Squares** | **Degrees of Freedom** | **Mean Squares** | **F (Calculated)** | **p-Value** | **F Critical** |
| **Between Groups** | **70,6** | 4 | **17,65** | **57,3** | **< 0,0001** | **2,87** |
| **Within Groups** | **6,16** | 20 | **0,31** | — | — | — |
| **Total** | **76,76** | 24 | — | — | — | — |

**Table 3-** Results with Tukey’s Post Hoc Test

| **Amount of chamote (%)** | | **0,0** | **0,5** | **1,0** | **1,5** | **2,0** |
| --- | --- | --- | --- | --- | --- | --- |
| **Com- pression** | **Strain (MPa)** | 106,6±5,4a | 99,5±5,0b | 86,7± 4,0c | 83,9±3,2c | 81,9±7,6c |
| **Stress (%)** | 41,70±1,20 | 40,72±1,13 | 39,60±1,67 | 39,83±1,76 | 38,27±1,98 |
| **Flexural** | **Strain (MPa)** | 95,7±2,7c | 105,4±2,4b | 123,9±2,6a | 80,2±2,8d | 53,1±4,7e |
| **Stress (%)** | 0,83±0,20c | 0,92±0,43c | 1,08± 0,25bc | 1,95±0,31a | 1,28±0,26b |
| **Tensile** | **Strain (MPa)** | 20,0±1,9b | 22,1±1,3ab | 24,5± 3,7a | 21,1±1,6b | 19,4 ± 2,7b |
| **Stress (%)** | 3,4±0,76a | 2,5±0,34b | 2,5±0,52b | 2,21±0,21bc | 1,65 ± 0,28c |
| **Impact Izod (J)** | | 1,7±0,6 | 1,9±0,6 | 2,0 ± 0,5 | 1,7±0,6 | 1,6 ± 0,3 |
| **Hardness Shore A** | | 78,0±0,89a | 79,8±0,43b | 80,2 ± 0,30c | 81,0±0,56c | 83,2 ± 0,40d |

**Table 4-** Dimensional deviation and warpage behavior of the SLA resin reinforced with chamotte

| **Chamotte (%)** | **Dimensional deviation (%)** | **Warpage (mm)** | **Dimensional accuracy (%)** |
| --- | --- | --- | --- |
| 0.0 | 2.84 ± 0.12 | 2.31 ± 0.15 | 94.3 ± 1.2 |
| 0.5 | 2.21 ± 0.10 | 1.86 ± 0.11 | 95.8 ± 1.0 |
| 1.0 | 1.74 ± 0.08 | 1.42 ± 0.09 | 97.4 ± 0.8 |
| 1.5 | 1.93 ± 0.11 | 1.57 ± 0.12 | 96.7 ± 0.9 |
| 2.0 | 2.17 ± 0.14 | 1.79 ± 0.13 | 95.9 ± 1.1 |

**Table 5 –** Directional shrinkage behavior of the SLA resin reinforced with chamotte

| **Chamotte (%)** | **X-axis shrinkage (%)** | | **Y-axis shrinkage (%)** | **Z-axis shrinkage (%)** |
| --- | --- | --- | --- | --- |
| 0.0 | 2.42 ± 0.11 | | 2.58 ± 0.13 | 3.12 ± 0.16 |
| 0.5 | 2.03 ± 0.10 | | 2.11 ± 0.12 | 2.71 ± 0.14 |
| 1.0 | 1.68 ± 0.08 | | 1.73 ± 0.09 | 2.21 ± 0.12 |
| 1.5 | 1.82 ± 0.10 | | 1.89 ± 0.11 | 2.39 ± 0.13 |
| 2.0 | 2.05 ± 0.12 | | 2.12 ± 0.13 | 2.63 ± 0.15 |
|  | |
